# Supplementary material for: N-Methyl-2-pyrrolidone as an excellent coordinative additive with a wide operating range for fabricating high-quality perovskite films
Source: Royal Society of Chemistry journal article supplement (doi:10.1039/c9qi00547a), 2019-01-01
Supplement: c9qi00547a1.pdf [file c9qi00547a1.pdf]

Electronic Supplementary Information for

**N-methyl-2-pyrrolidone as an Excellent Coordinative Additive with a Wide  
Operating Range for Fabricating High-Quality Perovskite Films**

Fangwen Cheng,<sup>†</sup> Xiaojing Jing,<sup>†</sup> Ruihao Chen, Jing Cao, Juanzhu Yan, Youyunqi Wu,  
Xiaofeng Huang, Binghui Wu\* and Nanfeng Zheng\*

State Key Laboratory for Physical Chemistry of Solid Surfaces, Collaborative  
Innovation Center of Chemistry for Energy Materials, and Engineering Research Center  
for Nano-Preparation Technology of Fujian Province, College of Chemistry and  
Chemical Engineering, Pen-Tung Sah Institute of Micro-Nano Science and Technology,  
Xiamen University, Xiamen 361005, China.

E-mails: binghuiwu@xmu.edu.cn; nfzheng@xmu.edu.cn. Fax: +86-592-2183047.

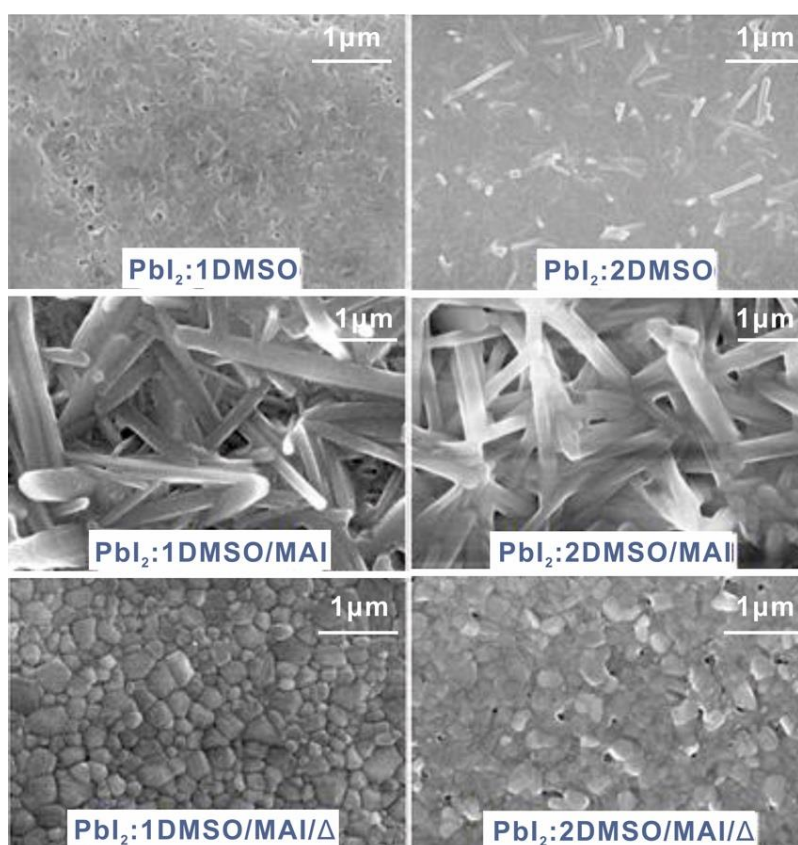

**Figure S1.** SEM images of  $\text{PbI}_2$  precursor films and the reaction with MAI before and after annealing ( $\Delta$ ) prepared with  $\text{PbI}_2/\text{DMSO}$  molar ratios of 1:1 and 1:2.

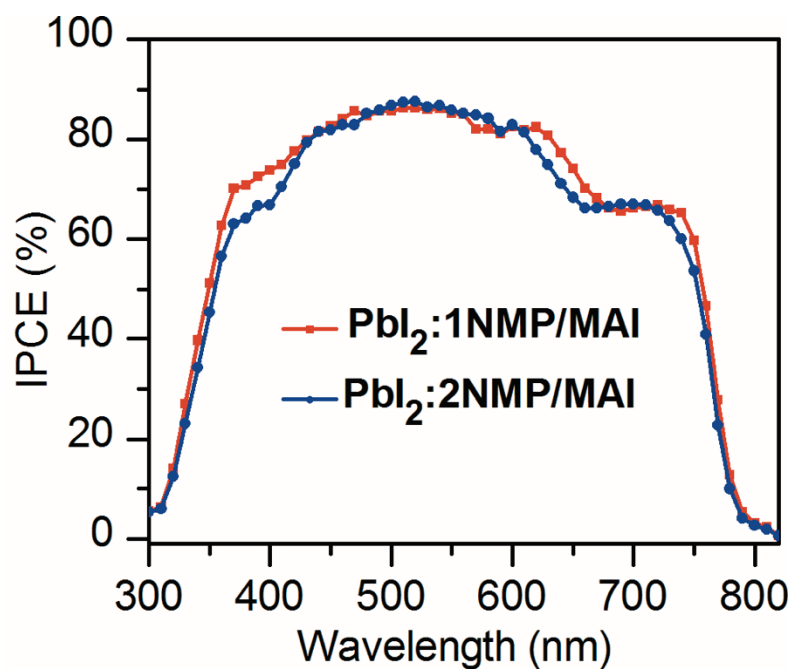

**Figure S2.** Best IPCE characteristics of perovskite films prepared with  $\text{PbI}_2/\text{NMP}$  molar ratios of 1:1 and 1:2.

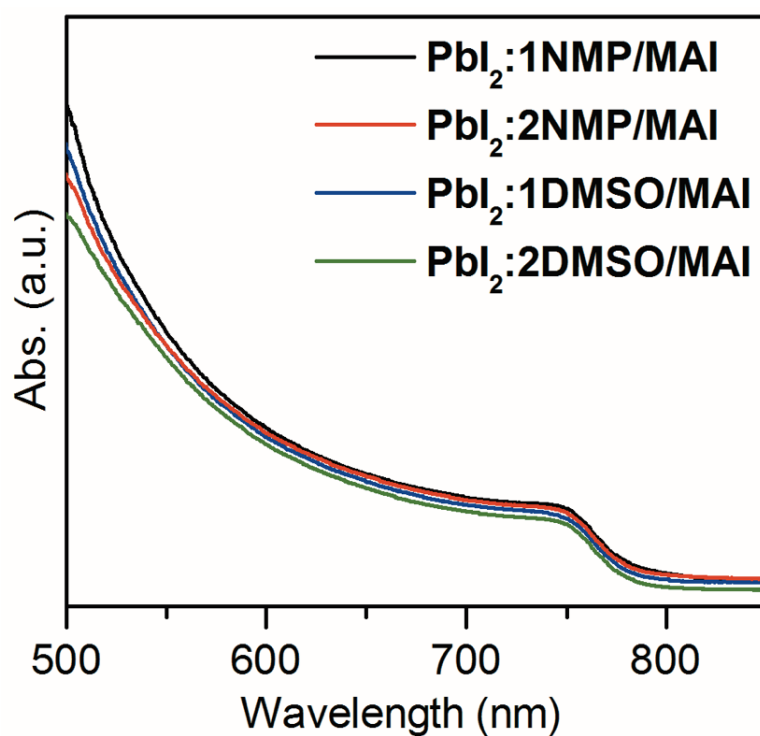

**Figure S3.** UV-vis absorption spectra of perovskite films prepared with different  $\text{PbI}_2/\text{NMP}$  ratios.

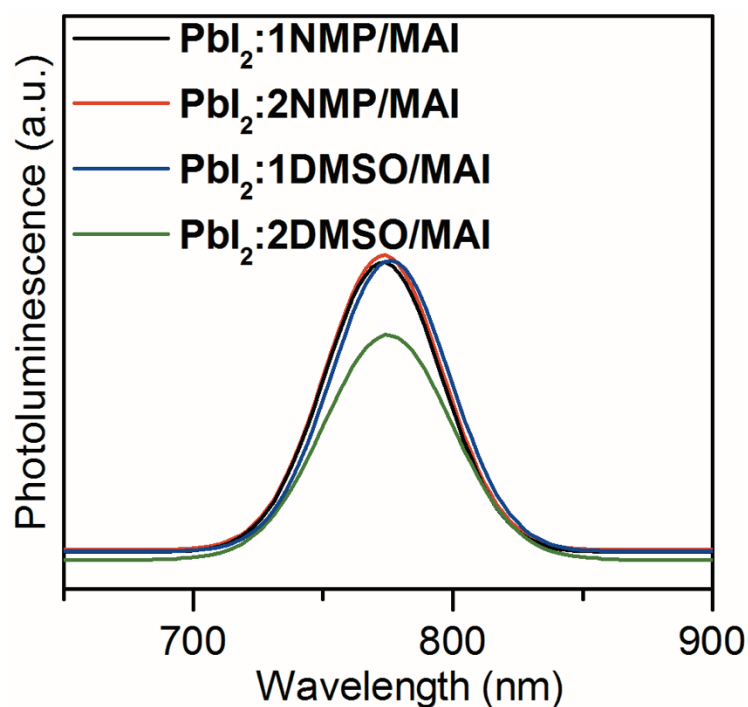

**Figure S4.** Steady-state photoluminescence spectra of perovskite films prepared with different  $\text{PbI}_2/\text{NMP}$  ratios. The quality of perovskite films made from NMP showed no dependence on  $\text{PbI}_2/\text{NMP}$  ratio, however, the  $\text{PbI}_2/\text{DMSO}$  ratio obviously affected the the quality of as-prepared perovskite films.

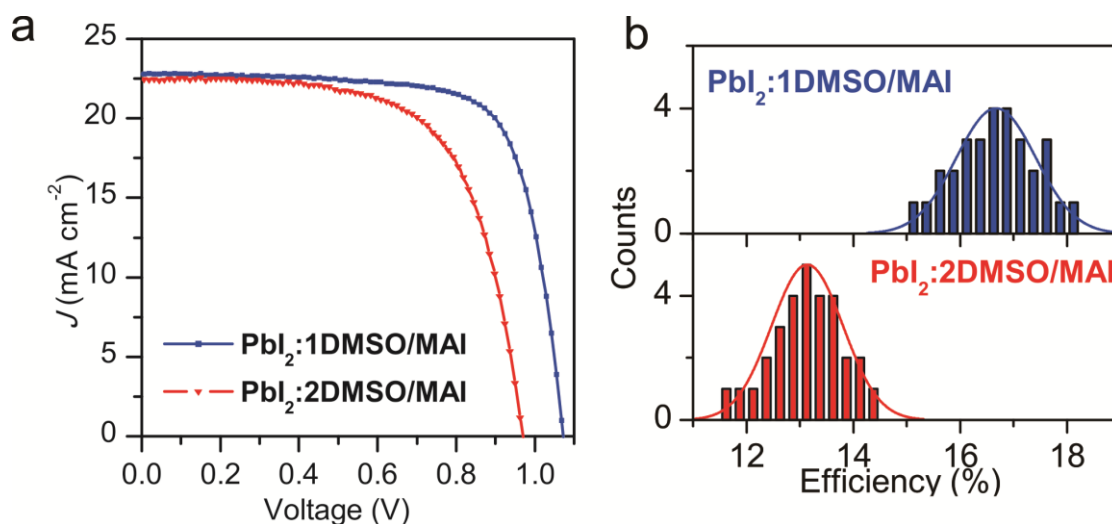

**Figure S5.** (a) Best  $J$ - $V$  characteristics and (b) histograms of efficiencies among 30 cells of PSC devices with  $\text{PbI}_2/\text{DMSO}$  molar ratios of 1:1 and 1:2.

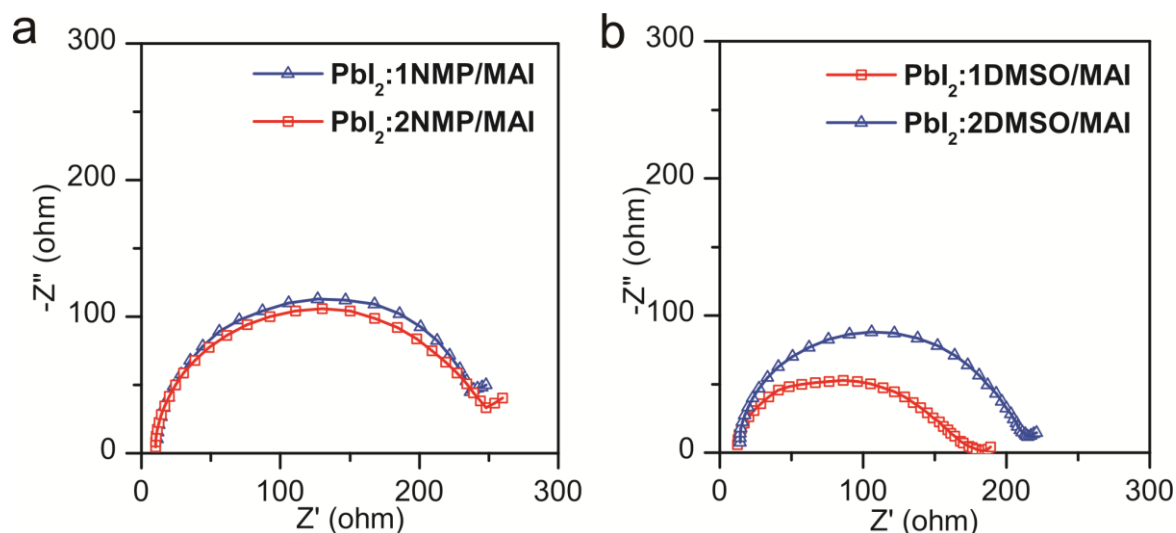

**Figure S6.** Electrical impedance spectroscopies (EIS) at 0 V bias under one sun illumination on whole devices with different perovskite layers: (a) PbI<sub>2</sub>:1NMP and PbI<sub>2</sub>:2NMP; (b) PbI<sub>2</sub>:1DMSO and PbI<sub>2</sub>:2DMSO. These impedances refer to the charge recombination rates in perovskite films.

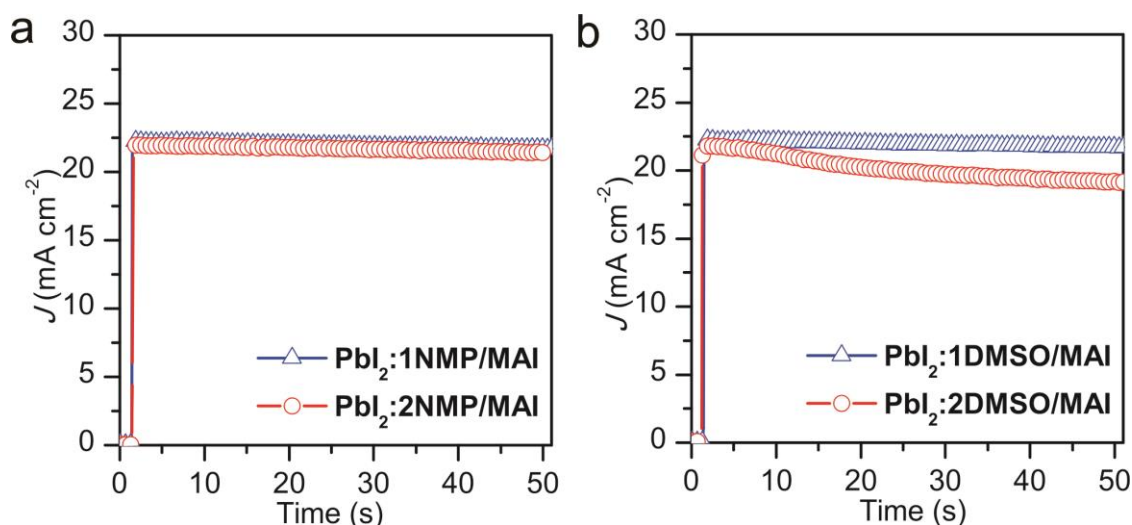

**Figure S7.** Stabilized outputs of current density measured as a function of time for devices fabricated with (a) PbI<sub>2</sub>:1NMP and PbI<sub>2</sub>:2NMP at their maximum power points (0.89 V bias and 0.88 V bias, respectively) and (b) PbI<sub>2</sub>:1DMSO and PbI<sub>2</sub>:2DMSO at their maximum power points (0.88 V bias and 0.82 V bias, respectively). The output of PbI<sub>2</sub>:1NMP, PbI<sub>2</sub>:2NMP and PbI<sub>2</sub>:1DMSO devices maintained stable over 50 s, which was in good agreement with the *J-V* tests. In contrast, the PbI<sub>2</sub>:2DMSO devices continuously degraded probably due to the presence of pinholes in the perovskite film (Figure S1).

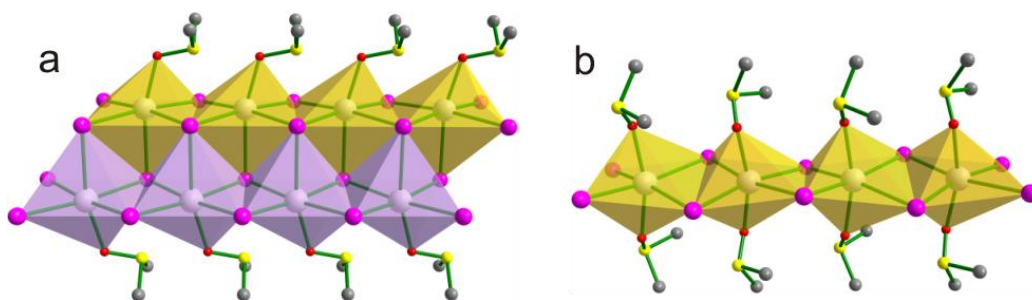

**Figure S8.** Crystal structure of (a)  $\text{PbI}_2 \cdot \text{DMSO}$  and (b)  $\text{PbI}_2 \cdot 2\text{DMSO}$ .

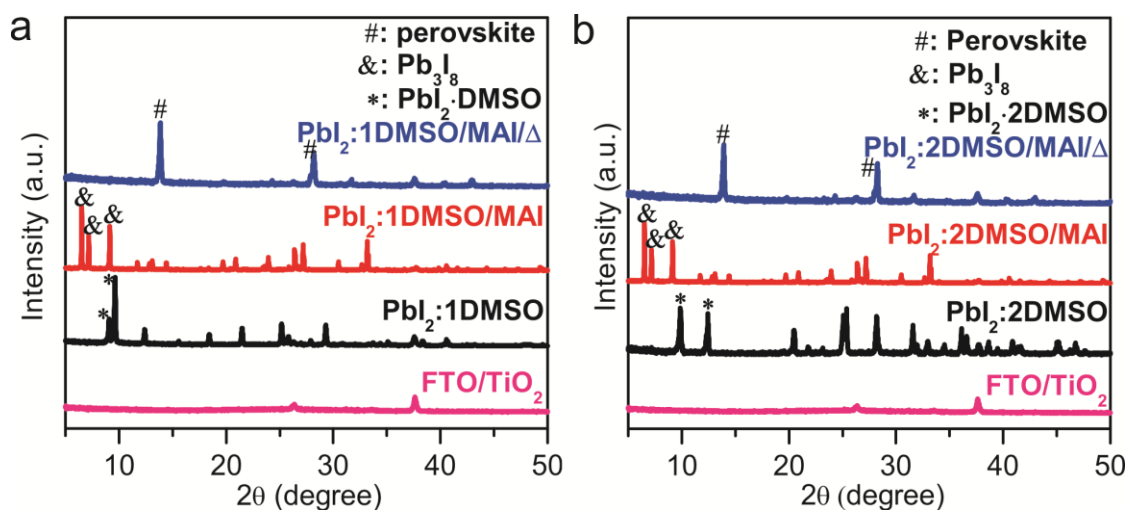

**Figure S9.** XRD patterns of the precursor films and the perovskite films (before and after annealing  $\Delta$ ) in the case of (a)  $\text{PbI}_2:1\text{DMSO}$  and (b)  $\text{PbI}_2:2\text{DMSO}$ .

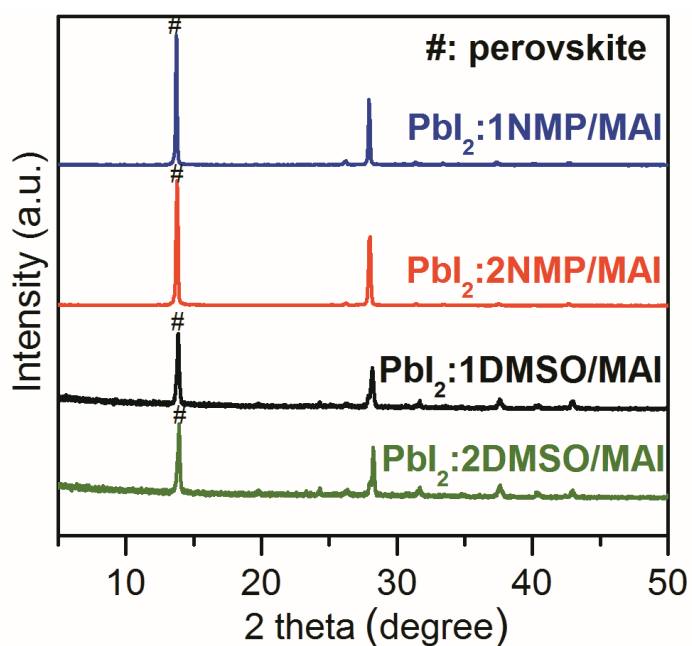

**Figure S10.** XRD patterns of the perovskite films deposited with  $\text{PbI}_2:1\text{NMP}$ ,  $\text{PbI}_2:2\text{NMP}$ ,  $\text{PbI}_2:1\text{DMSO}$  and  $\text{PbI}_2:2\text{DMSO}$ .

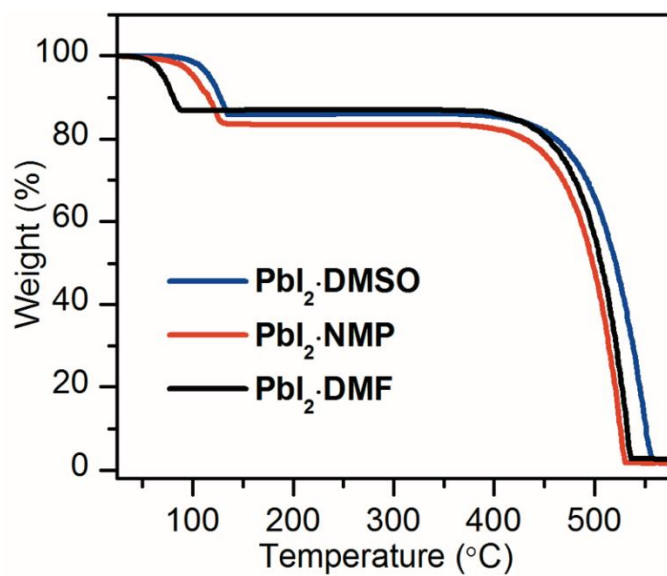

**Figure S11.** TGA curves of  $\text{PbI}_2 \cdot \text{DMF}$ ,  $\text{PbI}_2 \cdot \text{NMP}$  and  $\text{PbI}_2 \cdot \text{DMSO}$  powder samples.

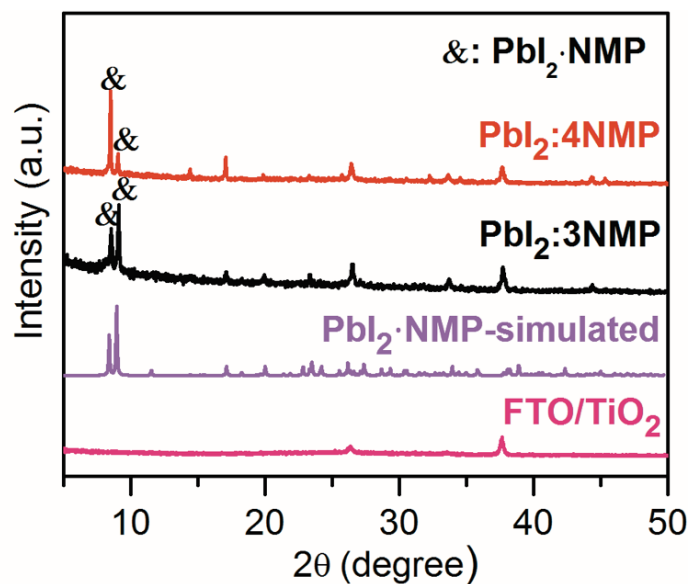

**Figure S12.** Comparison of simulated and experimental XRD patterns of precursor films prepared with  $\text{PbI}_2/\text{NMP}$  molar ratios of 1:3 and 1:4.

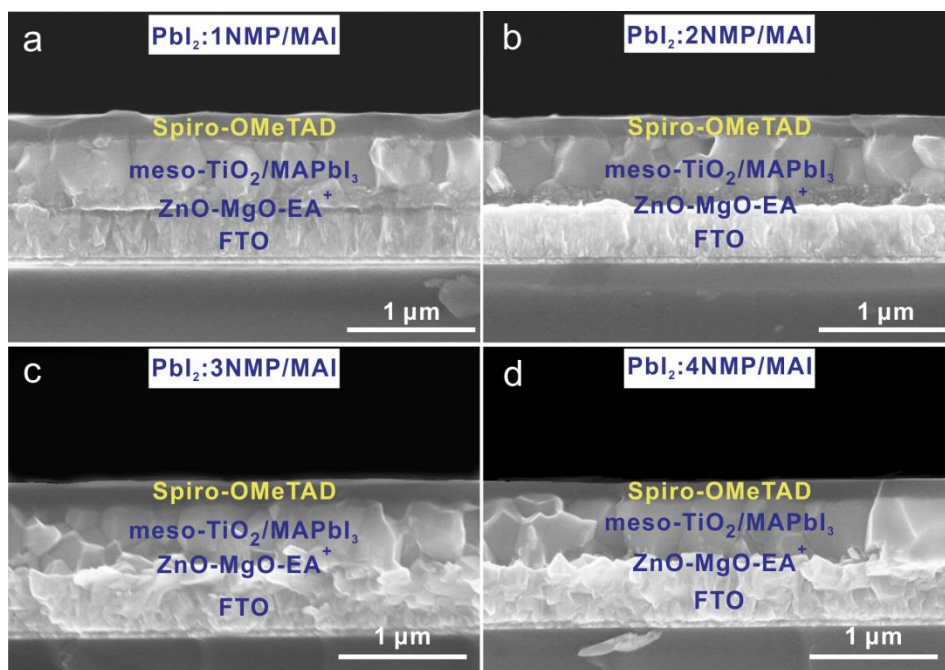

**Figure S13.** Cross-sectional SEM images of devices fabricated with  $\text{PbI}_2/\text{NMP}$  molar ratios of (a) 1:1, (b) 1:2, (c) 1:3 and (d) 1:4.

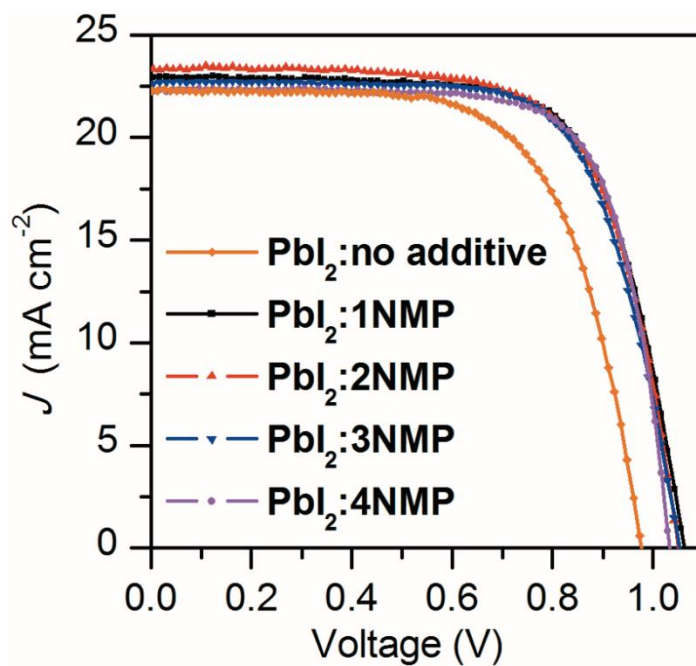

**Figure S14.**  $J$ - $V$  characteristics of  $\text{MAPbI}_3$  PSCs fabricated with different  $\text{PbI}_2/\text{NMP}$  ratios (from 1:0 to 1:4).



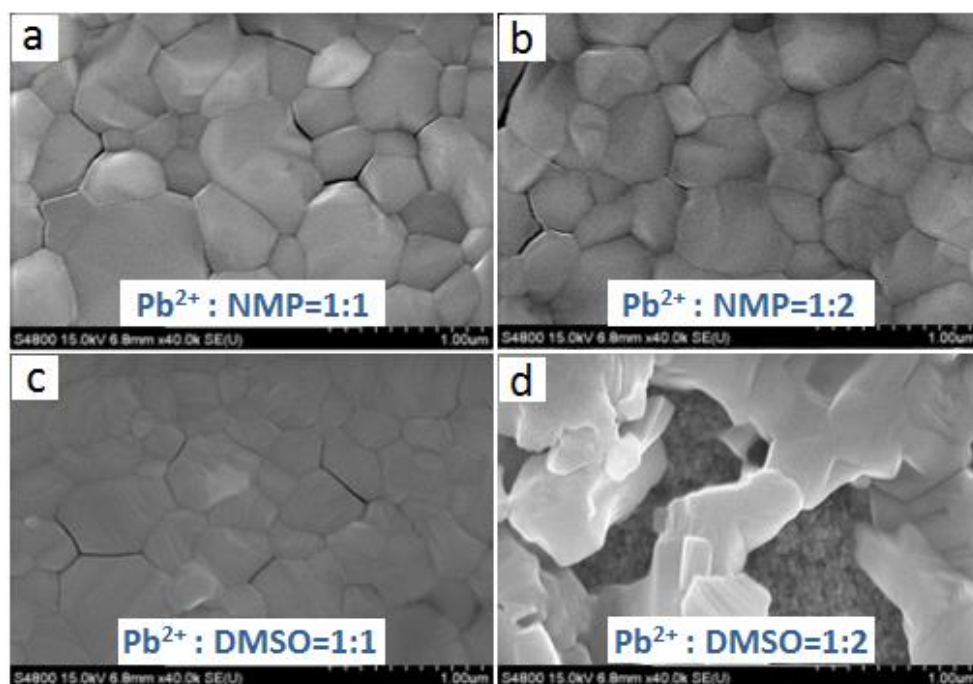

**Figure S15.** SEM images of Cs/FA/MA perovskite films prepared with  $\text{Pb}^{2+}$ /NMP molar ratios of (a) 1:1 and (b) 1:2 and  $\text{Pb}^{2+}$ /DMSO molar ratios of (c) 1:1 and (d) 1:2.

**Table S1.** Photovoltaic parameters of the champion cells with different molar ratios of  $\text{PbI}_2$ /NMP and different fabricated methods.

| Devices                             | $J_{sc}/\text{mA}\cdot\text{cm}^{-2}$ | $V_{oc}/\text{V}$ | $FF/\%$ | $\eta/\%$ | $R_s/\Omega\cdot\text{cm}^{-2}$ |
|-------------------------------------|---------------------------------------|-------------------|---------|-----------|---------------------------------|
| $\text{PbI}_2$ :1NMP/MAI            | 23.5                                  | 1.07              | 75.6    | 19.1      | 3.41                            |
| $\text{PbI}_2$ :2NMP/MAI            | 23.5                                  | 1.06              | 77.1    | 19.2      | 3.90                            |
| $\text{Pb}^{2+}$ :1NMP/CsI-FAI-MABr | 24.5                                  | 1.07              | 76.5    | 20.1      | 3.36                            |
| $\text{Pb}^{2+}$ :2NMP/CsI-FAI-MABr | 24.5                                  | 1.06              | 76.8    | 20.1      | 3.66                            |



**Table S2.** Crystal data and structure refinement for PbI<sub>2</sub>·NMP.

| Complexes                                              | PbI <sub>2</sub> NMP                                                     |
|--------------------------------------------------------|--------------------------------------------------------------------------|
| Formula                                                | C <sub>5</sub> H <sub>9</sub> I <sub>2</sub> NOPb                        |
| M/g mol <sup>-1</sup>                                  | 560.12                                                                   |
| T/K                                                    | 100.01(10)                                                               |
| Crystal system                                         | Monoclinic                                                               |
| Space group                                            | <i>P2/m</i>                                                              |
| <i>a</i> /Å                                            | 4.6337(2)                                                                |
| <i>b</i> /Å                                            | 19.1129(8)                                                               |
| <i>c</i> /Å                                            | 12.1265(5)                                                               |
| $\alpha$ /deg                                          | 90                                                                       |
| $\beta$ /deg                                           | 98.144(4)                                                                |
| $\gamma$ /deg                                          | 90                                                                       |
| <i>V</i> /Å <sup>3</sup>                               | 1063.13(8)                                                               |
| <i>Z</i>                                               | 4                                                                        |
| <i>d</i> <sub>cal</sub> /g cm <sup>-3</sup>            | 3.499                                                                    |
| Limiting indices                                       | -5 ≤ <i>h</i> ≤ 6,<br>-23 ≤ <i>k</i> ≤ 24,<br>-15 ≤ <i>l</i> ≤ 11        |
| Reflections<br>collected /<br>unique                   | 2422/2177<br>[ <i>R</i> ( <i>int</i> ) =<br>0.0655]                      |
| Goodness-of-fit on <i>F</i> <sup>2</sup>               | 1.049                                                                    |
| Final <i>R</i> indices<br>[ <i>I</i> > 2σ( <i>I</i> )] | <i>R</i> <sub><i>I</i></sub> = 0.0564<br><i>wR</i> <sub>2</sub> = 0.1386 |
